# Supplementary material for: Multi-functional nanotracers for image-guided stem cell gene therapy
Source: Royal Society of Chemistry journal article supplement (doi:10.1039/c6nr09090g), 2017-01-01
Supplement: c6nr09090g1.pdf [file c6nr09090g1.pdf]

Supporting Information for

**Multi-functional Nanotracers for Image-guided Stem Cell  
Gene Therapy**

*Ji Sun Park,<sup>a,1</sup> Wooram Park,<sup>b,1</sup> A Young Kang,<sup>a</sup> Andrew C. Larson,<sup>b,c,d,e,f</sup>*

*Dong-Hyun Kim,<sup>b,c</sup> and Keun-Hong Park<sup>a,\*</sup>*

<sup>a</sup>Department of Biomedical Science, College of Life Science, CHA University, 6F, CHA Biocomplex, Sampyeong-Dong, Bundang-gu, Seongnam-si, 13488, Republic of Korea.

<sup>b</sup>Department of Radiology, Northwestern University Feinberg School of Medicine, Chicago, IL 60611, USA.

<sup>c</sup>Robert H. Lurie Comprehensive Cancer Center, Chicago, IL 60611, USA.

<sup>d</sup>Department of Biomedical Engineering, Northwestern University, Evanston, IL 60208, USA.

<sup>e</sup>Department of Electrical Engineering and Computer Science, Evanston, IL 60208, USA.

<sup>f</sup>International Institute of Nanotechnology (IIN), Northwestern University, Evanston, IL 60208, USA

[<sup>1</sup>]These authors contributed equally to this work.

**\*Corresponding Author:** Prof. Keun-Hong Park (pkh0410@cha.ac.kr)

## Experimental section

**Subcellular fractionation:** Nuclear and cytoplasmic fractions were isolated using a NE-PER® Nuclear and Cytoplasmic Extraction Reagent Kit (Thermo Scientific, cat.# 78833) as previously described.<sup>1, 2</sup> Briefly, hMSCs were washed with PBS and resuspended in cytoplasmic extract buffer (10 mM HEPES pH 7.9, 10 mM KCl, 0.1 mM EDTA, 0.3% NP-40, and a protease inhibitor cocktail). After gentle rotation at 4°C for 10 min, samples were centrifuged at 3000 rpm for 5 min. Supernatants (cytosolic fraction) were transferred to fresh tubes and stored on ice. Pellets (nuclear fraction) were washed with nuclear extract buffer (20 mM HEPES pH 7.9, 0.4 M NaCl, 1 mM EDTA, 25% glycerol, and a protease inhibitor cocktail), resuspended in PBS, and physically sheared by sonication. Western blot analysis was performed to evaluate the EGFP expression level in each fraction.

## References for Supporting Information

1. N.-A. Liu, J. Sun, K. Kono, Y. Horikoshi, T. Ikura, X. Tong, T. Haraguchi and S. Tashiro, *FASEB J.*, 2015, **29**, 2514-2525.
2. H. Shima, H. Suzuki, J. Sun, K. Kono, L. Shi, A. Kinomura, Y. Horikoshi, T. Ikura, M. Ikura and R. Kanaar, *J. Cell. Sci.*, 2013, **126**, 5284-5292.

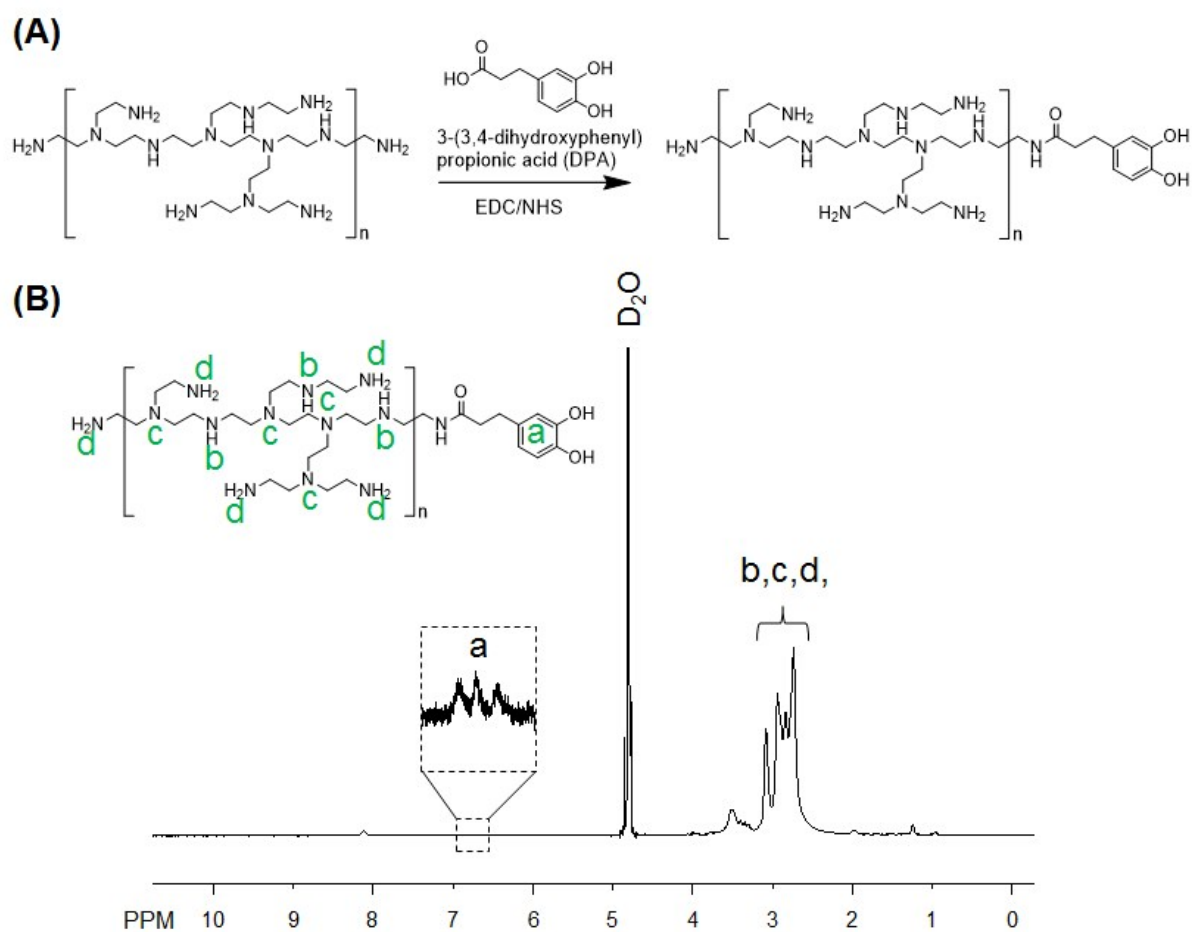

**Fig. S1** (A) Synthetic route of C-bPEI. (B)  $^1\text{H}$ -NMR analysis of C-bPEI in  $\text{D}_2\text{O}$ .

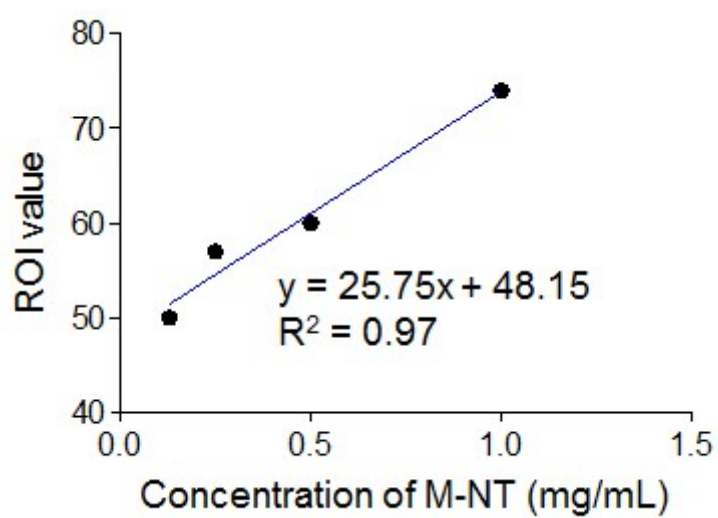

**Fig. S2** A linear regression curve obtained by plotting the region of interest (ROI) value of M-NT at different concentration.

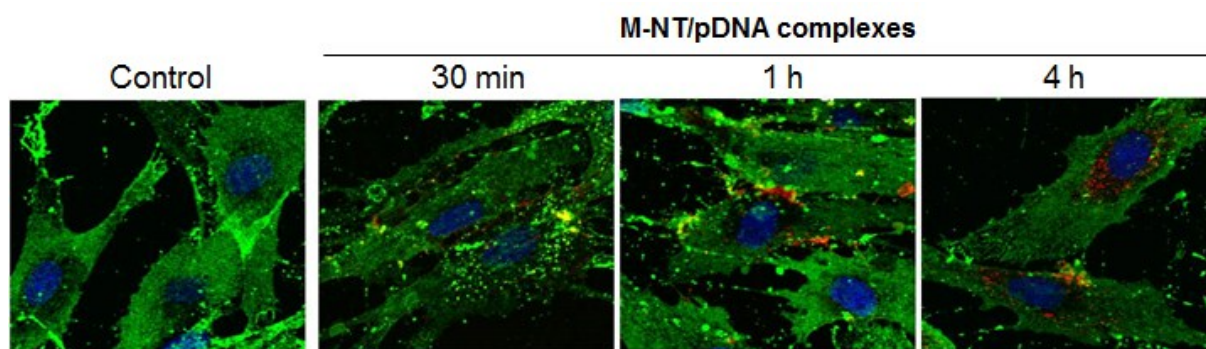

**Fig. S3** CLSM images of hMSCs treated with M-NT/pDNA complexes as a function of time (red fluorescence: RITC-labeled M-NTs, green fluorescence: cellular membranes stained with DiO).

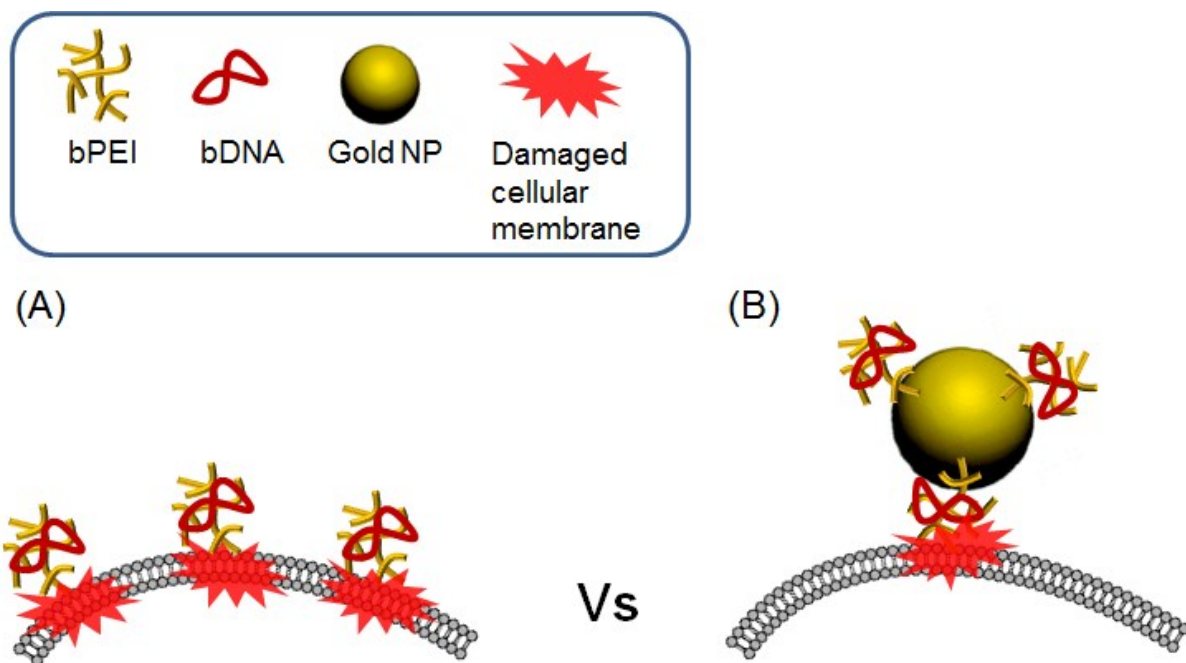

**Fig. S4** Schematic illustration of the hypothesized cellular uptake mechanism of bPEI/pDNA versus M-NT/pDNA complexes. When it is assumed that the treated concentrations of bPEI/pDNA and M-NT/pDNA complexes are the same, bPEI/pDNA complexes (A) could have more contact points with the cellular membrane than M-NT/pDNA complexes (B), resulting in more severe cellular membrane damage.

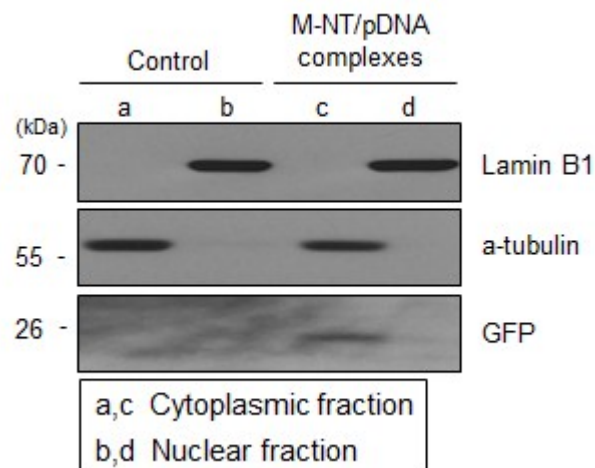

**Fig. S5** Western blot analysis of GFP expression in cytoplasmic and nuclear fractions of hMSCs treated with M-NT/pDNA complexes ( $\alpha$ -tubulin and lamin B1 are representative protein markers expressed in the cytoplasmic and nuclear fractions, respectively).

# RITC imaging

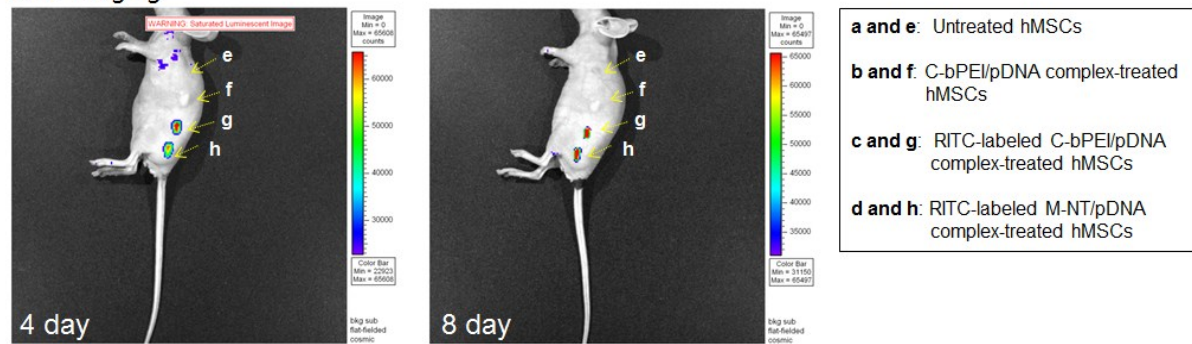

**Fig. S6** *In vivo* optical fluorescence of transplanted hMSCs in Balb/c nude mice: RITC images of transplanted hMSCs (treated with M-NT/pDNA complexes) in Balb/c nude mice at 4 and 8 days after transplantation, respectively.

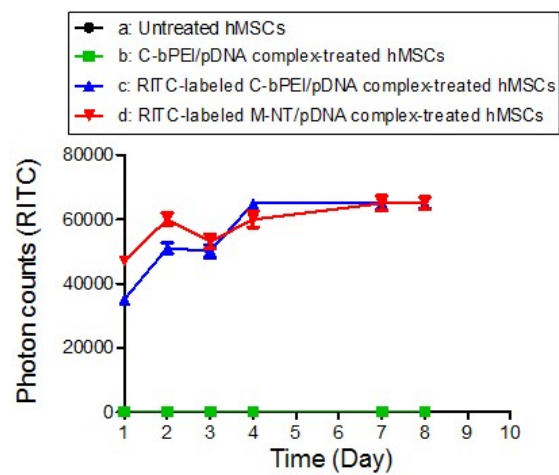

**Fig. S7** Quantitative analysis of RITC fluorescence images from hMSCs (untreated or treated with different samples) transplanted into Balb/c nude mice.

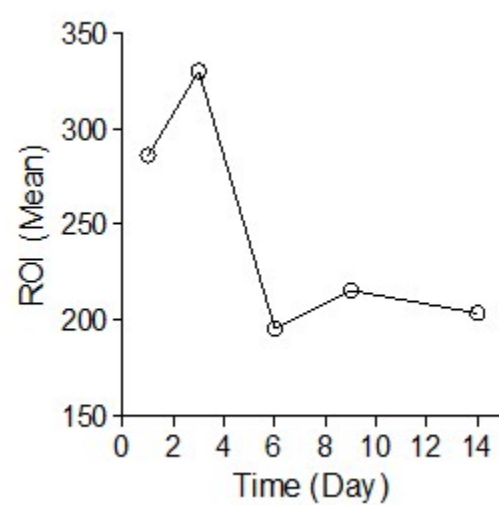

**Fig. S8** Quantitative analysis of micro-CT images from hMSCs (treated with M-NT/pEGFP) transplanted into Balb/c nude mice.
